# Supplementary material for: Quantitative Proteomics Analysis Identifies Mitochondria as Therapeutic Targets of Multidrug-Resistance in Ovarian Cancer
Source: PubMed Central journal article supplement — Theranostics. 2014 Sep 18;4(12):1164–75. doi: 10.7150/thno.8502 (PMC4183995; doi:10.7150/thno.8502), 2014-09-18

## **Supporting information**

**Figure S1** Cytotoxic effects of doxorubicin on OVCAR8 and NCI\_ADR/RES cells. Cells were treated with various concentrations of doxorubicin. After incubation for 48 hours, cell proliferation was determined by MTT assays.

**Figure S2** Verification of the purity of isolated mitochondria by western blotting. Western blotting was performed on total cell lysis (TCL), cytosol (SNP), and mitochondrial (M) fractions after cellular fractionation. IMM, inner mitochondrial membrane; OMM, outer mitochondrial membrane; matrix, mitochondrial matrix.

**Figure S3** Flowcharts of forward and reverse SILAC-based mitochondrial quantitative proteome.

**Figure S4** A summary of the number of proteins quantified from three independent SILAC experiments. F1 result was obtained from forward SILAC experiments, R1 and R2 results were from two reverse SILAC experiments.

Figure S1

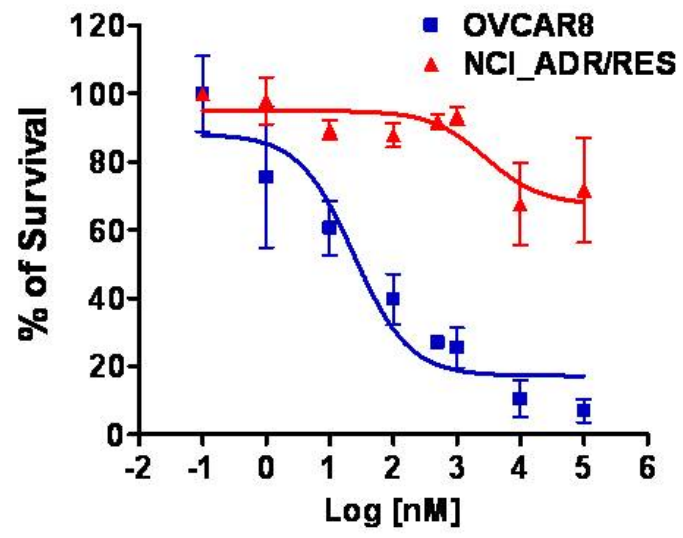

Figure S2

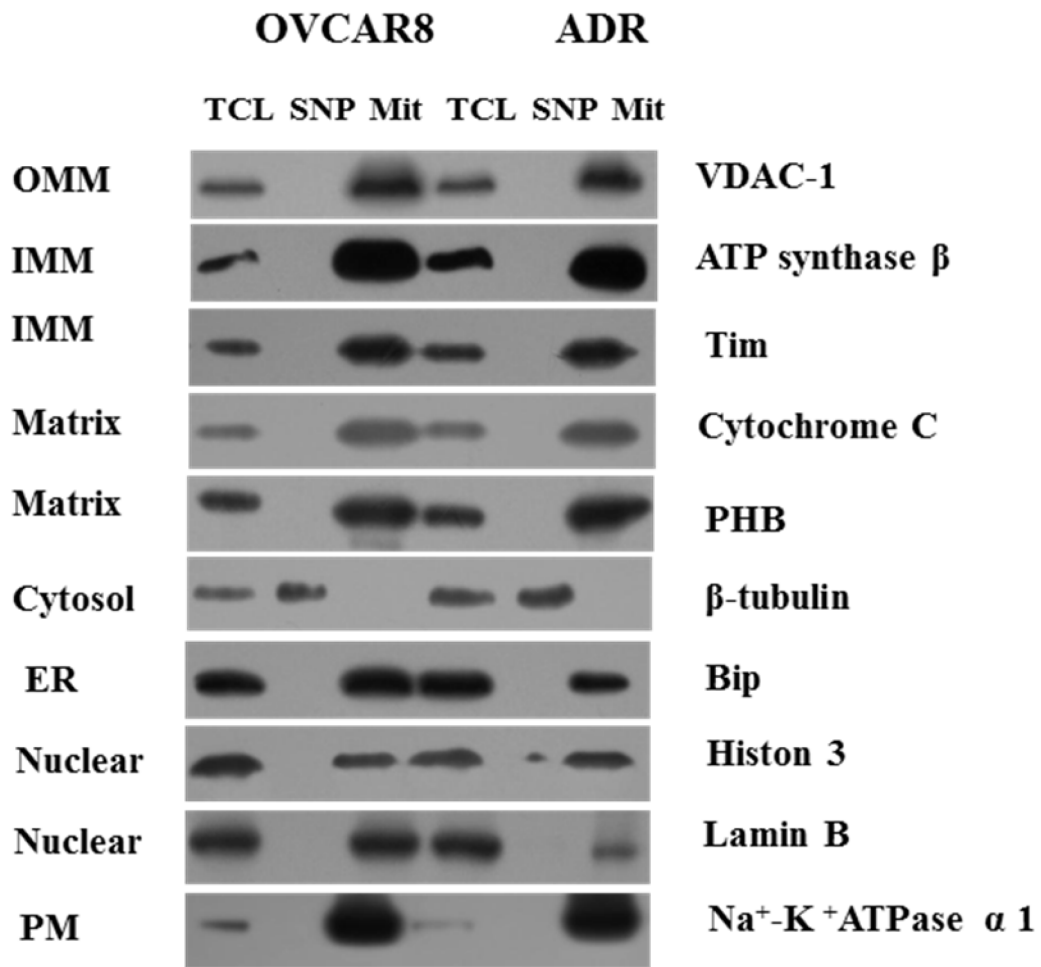

Figure S3

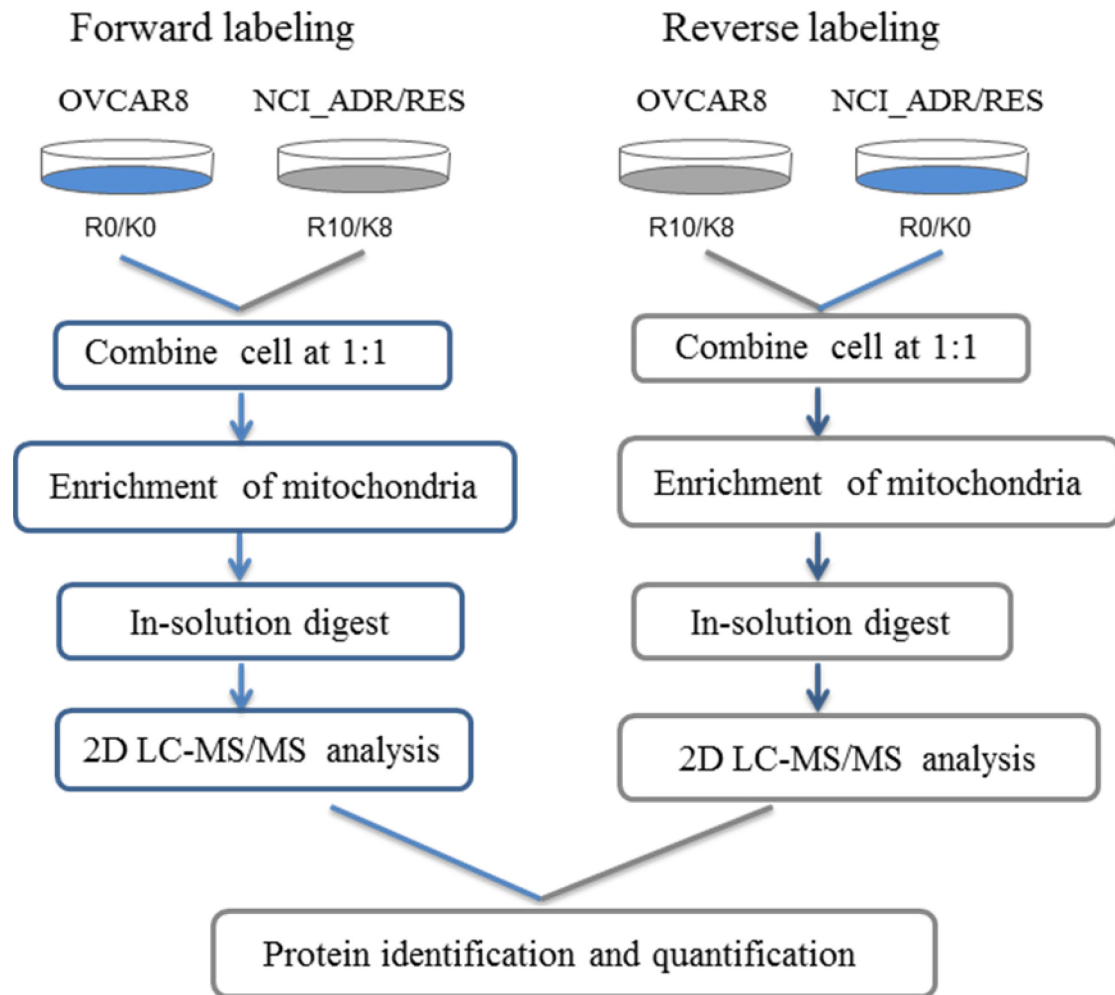

Figure S4

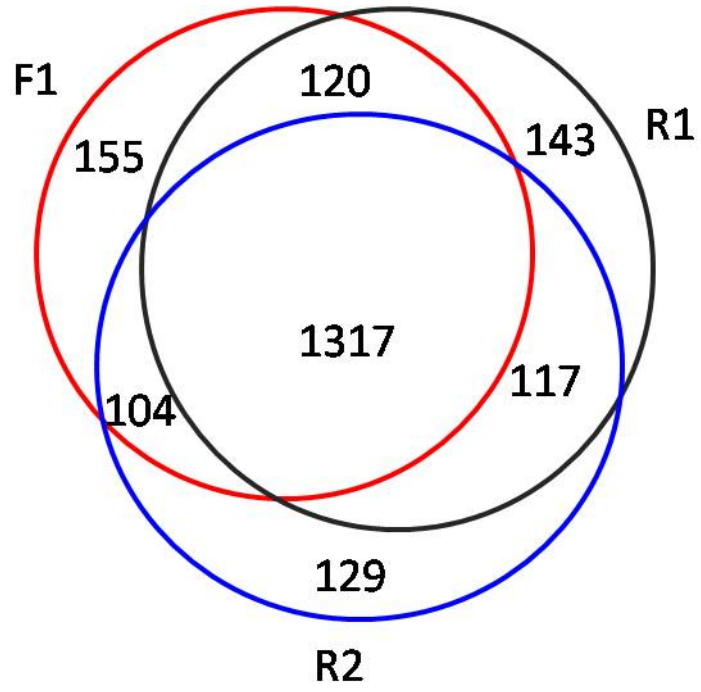

Supplement: thnov04p1164s3.pdf [file thnov04p1164s3.pdf]
